# Supplementary material for: Increased Density of Growth Differentiation Factor-15+ Immunoreactive M1/M2 Macrophages in Prostate Cancer of Different Gleason Scores Compared with Benign Prostate Hyperplasia
Source: MDPI journal article supplement (doi:10.3390/cancers14194591), 2022-09-22
Supplement: s1 [file s1]

**Supplementary Materials:**

| Name                                                               | Cat. number   | Company                                      |
|--------------------------------------------------------------------|---------------|----------------------------------------------|
| <b>Primary antibodies</b>                                          |               |                                              |
| Mouse anti-human CD4                                               | MAB379        | R&D Systems, Minneapolis, USA.               |
| Mouse anti-human CD8                                               | IHCR2114-6    | EMD Millipore, Billerica, USA                |
| Mouse anti-human CD19                                              | MCA2454T      | Bio-Rad, Kidlington, UK.                     |
| Mouse anti-human CD68                                              | M0876         | Dako, Glostrup, Dänemark                     |
| Mouse anti-human CD163                                             | ab74604       | Abcam, Cambridge, UK                         |
| Rat anti-human GDF-15                                              | ab189358      | Abcam, Cambridge, UK                         |
| Rabbit anti-human PD-L1 (CD274)                                    | 13684         | Cell Signaling Technology, Inc. Danvers, USA |
| Rabbit anti-human PGP9.5 Ubiquitin C-Terminal Hydrolase L1 (UCHL1) | CL95101       | Cedarlane, Burlington, USA                   |
| <b>Secondary antibodies</b>                                        |               |                                              |
| Rabbit anti-mouse-AP                                               | ab6729/ab7077 | Abcam, Cambridge, UK                         |
| Donkey anti-rabbit-biotin                                          | 711-005-152   | Jackson I.R.E. Ltd. Cambridge, UK            |
| Goat anti-rabbit-HRP                                               | ZRH 1158      | Linaris GmbH, Mannheim, Germany              |
| Goat anti-rat-AP                                                   | 112-055-003   | Dianova, Hamburg, Germany                    |
| Donkey anti-mouse-biotin                                           | 715-165-151   | Dianova, Hamburg, Germany                    |
| Donkey anti-rat-biotin                                             | 712-165-153   | Dianova, Hamburg, Germany                    |
| <b>Immunofluorescence double staining</b>                          |               |                                              |
| Mouse anti-human CD68                                              | M0876         | Dako, Glostrup, Dänemark                     |
| Mouse anti-human CD163                                             | ab74604       | Abcam, Cambridge, UK                         |
| Rat anti-human GDF-15                                              | ab189358      | Abcam, Cambridge, UK                         |
| Streptavidin, Alexa Fluor™ 488                                     | S 11223       | Invitrogen, Karlsruhe, Germany               |
| Donkey IgG anti-rat IgG (H+L)-Cy3                                  | 715-165-151   | Dianova, Hamburg, Germany                    |

Table S1: Antibodies used in the study.
